# Activation of the JAK-STAT Signal Transduction Pathway by Oncostatin-M in Cultured Human and Mouse Osteoblastic Cells\*

JOAN B. LEVY, CHRIS SCHINDLER, REGINA RAZ, DAVID E. LEVY,  
ROLAND BARON, AND MARK C. HOROWITZ

*Departments of Orthopaedics and Rehabilitation (J.B.L., R.B., M.C.H.) and Cell Biology (J.B.L., R.B.), Yale University School of Medicine, New Haven, Connecticut 06520-8071; Department of Medicine (C.S.), Columbia University College of Physicians and Surgeons, New York, New York 10032; and the Department of Pathology and Kaplan Comprehensive Cancer Center (R.R., D.E.L.), New York University School of Medicine, New York, New York 10016*

## ABSTRACT

Oncostatin M (OSM) is one member of the leukemia inhibitory factor/interleukin-6 family of cytokines that has been shown to be a growth regulatory molecule. In osteoblastic cultures, OSM causes marked phenotypic changes and the enhanced secretion of interleukin-6. In this study, we have shown that stimulation of murine and human osteoblastic cultures and a human osteosarcoma cell line with OSM resulted in the tyrosine phosphorylation of a number of cellular proteins including members of both the Janus kinase (JAK) and signal transducer and activator of transcription (STAT) family of signaling proteins. The JAKs, a family of intracellular kinases, and the STATs, a family of transcription factors, have both previously

been shown to be tyrosine phosphorylated and activated in response to various cytokines, interferons, and growth factors in cells of non-skeletal origin. Using three different sources of cells of the osteoblast lineage, we demonstrate that OSM induces a rapid but transient tyrosine phosphorylation of the three JAK family members tested, JAK1, JAK2, and Tyk2. In addition, two members of the STAT family, Stat1 $\alpha$  and Stat3, are tyrosine phosphorylated in osteoblastic cells in culture in response to OSM. OSM activation of this pathway in cells of the osteoblast lineage will result in the transcription of specific genes that ultimately may be associated with osteoblast function. (*Endocrinology* **137**: 1159–1165, 1996)

CYTOKINES are soluble factors that mediate communication between cells and play important roles in biological processes including hematopoiesis, neurogenesis, embryonic development, cachexia, inflammation, muscle proliferation, and bone remodeling (1–3). The majority of cytokines bind to their cell surface receptors and initiate intracellular signaling events by inducing the rapid tyrosine phosphorylation of specific proteins. Structurally many cytokine receptors do not possess intrinsic tyrosine kinase activity, but rather associate with and activate members of the Janus (JAK) family of protein tyrosine kinases (reviewed in Refs. 4–6). Ligand binding to receptor leads to activation of specific members of the JAK family, which results in the tyrosine phosphorylation of the kinase itself, subunits of the cytokine receptor, and several cytoplasmic proteins. One major group of cytoplasmic proteins that becomes tyrosine phosphorylated has been named STATs (signal transducers and activators of transcription). When activated by tyrosine phosphorylation, the STATs translocate to the nucleus and bind to specific DNA sequences to stimulate transcription (7–14). The identification of the JAK-STAT signaling path-

way used by cytokines has provided an important link between events elicited by tyrosine kinases at the cell surface to downstream events activated in the nucleus.

With respect to the cellular process of bone remodeling, there is increasing evidence that cytokines are critically important. Cells in the osteoblast lineage, which are responsible for new bone formation during the process of remodeling, respond to a variety of stimuli and secrete a specific set of cytokines including macrophage-colony stimulating factor and granulocyte-macrophage colony stimulating factor (15, 16). In addition, several members of the leukemia inhibitory factor (LIF)/interleukin (IL)-6 subfamily of cytokines have been shown to have demonstrable bone regulatory activity. This family including LIF, oncostatin-M (OSM), IL-6, IL-11, ciliary neurotrophic factor, and a new member, cardiotrophin-1, are related by protein structure, overlapping function, and share a common signal transducing receptor component, gp130 (17–22). It has been suggested that IL-6, the prototypic member of this family, plays an important role in osteoclastogenesis, particularly in the development of postmenopausal osteoporosis (23, 24). Furthermore, treatment of cocultures of osteoblasts and bone marrow cells, as a source of osteoclast precursors, with IL-11, LIF, and OSM also induce osteoclast formation (23, 25). Some of the other LIF/IL-6 family members have been shown to exert differential effects on osteoblast and/or osteoclast function. For example, osteoblast-like cells are able to secrete and respond to IL-11, LIF, and IL-6 (26–32). Moreover, transgenic mice that overexpress the gene encoding for OSM under the control of the

Received September 12, 1995.

Address all correspondence and requests for reprints to: Dr. Joan B. Levy, Department of Orthopaedics and Rehabilitation, Yale University School of Medicine, P.O. Box 208071, New Haven, Connecticut 06520-8071.

\* This work was supported by NIH Grants AR-40073 and AR-40507 (to M.C.H.), AR-42927 (to R.B.), AI-28900 (to D.E.L.), and an NIH National Research Service Award 1-F33-AR-08261-01 (to J.B.L.).

metallothionein promotor develop osteopetrosis (33). Therefore, understanding the complex circuitry by which the members of the IL-6 family regulate osteoblast-osteoclast interactions and activity is critical in light of the fact that these factors appear to play important roles in the regulation of normal and pathologic bone remodeling.

Studies from our laboratory demonstrate that treatment of osteoblastic cells in culture with OSM causes marked phenotypic changes including a modest increase in cell proliferation, increased collagen synthesis, decreased alkaline phosphatase activity, and a marked increase in IL-6 secretion (34). OSM elicits these biological effects in osteoblast-like cells through the utilization of specific signaling pathway(s). The work presented here is the first to elucidate a signal transduction cascade induced in OSM-treated primary murine and human osteoblastic cells in culture.

## Materials and Methods

### Reagents and antibodies

Recombinant human OSM (bacterial derived, purified by sequential chromatography with no detectable endotoxin) was the gift of Dr. A. Gregory Bruce, Bristol-Myers Squibb (Seattle, WA). CLS-2 bacterial collagenase was obtained from Worthington Biomedical Corp. (Freehold, NJ). New born calf serum (NBCS) was purchased from Irvine Scientific (Santa Ana, CA), and trypsin was supplied by GIBCO Laboratories (Grand Island, NY). The Micro BCA protein assay kit was supplied by Pierce (Rockford, IL). Protein A-Sepharose was obtained from Sigma Chemical Co. (St. Louis, MO). Nitrocellulose filter paper was purchased from Schleicher and Schuell (Keene, NH). The enhanced chemiluminescence (ECL) system was obtained from Amersham (Arlington Heights, IL).

Antibodies against the tyrosine kinases JAK1, JAK2, and Tyk 2 were purchased from Upstate Biotechnology (Lake Placid, NY) and used according to the conditions recommended by the supplier. A mixture of antiphosphotyrosine monoclonal antibodies 4G10 (Upstate Biotechnology) and PY20 (ICN Biomedicals, Costa Mesa, CA) each at a final concentration of 0.5  $\mu\text{g}/\text{ml}$  was used for Western blotting. Characterization of the N- and C-terminal antibodies against Stat1 $\alpha$  has been described (35). Anti-Stat3 antibodies were generated against a bacterial fusion protein expressing amino acids 717–769 of murine Stat3 (14). Peroxidase-conjugated secondary antibodies were obtained from Bio-Rad (Hercules, CA).

### Cells

Neonatal murine calvarial derived osteoblastic cells were prepared as previously described (36). Calvariae from 3- to 5-day-old C57BL/6J mice were removed and pretreated with 4 mM EDTA in PBS [10 mM sodium phosphate (pH 7.4), 137 mM NaCl] twice (10 min each). The calvariae were then subjected to sequential enzymatic digestion using CLS-2 bacterial collagenase at 200 U/ml in PBS over a 65-min period. The first two incubations of cells with collagenase each lasted 10 min and were followed by three 15-min digestions. Cells released after each digestion were collected, and fractions 3–5 were pooled. When examined immediately after isolation, the released cells in this pool were highly enriched for cells in the osteoblast lineage (37). The cells were washed twice in MEM with 10% NBCS, counted, plated at a low density of approximately  $1\text{--}2 \times 10^4$  cells per ml ( $1000 \text{ cells}/\text{cm}^2$ ), and grown to confluence (5–7 days) before stimulation. Seeding at this density selects for proliferating cells consistent with osteoblast precursors and osteoblasts (38).

All animals were acquired and maintained in accordance with the NIH Guide for the Use of Laboratory Animals, and the tissue used in this study was obtained using protocols approved by Yale's Animal Care and Use Committee.

Normal human osteoblastic cells were obtained using techniques previously described (27). Sterile normal human bone was obtained

from patients (>60 years old) who were undergoing surgery after accidental injury or hip replacement. The bone was cleared of soft and connective tissue, and the trabecular surfaces were exposed. The trabecular bone was processed into small chips by mechanical reaming, and the chips were washed in serum-free medium and further minced with a straight microdissecting scissors in sterile glass vials with conical bottoms. The minced bone chips were washed extensively to remove blood components and incubated in medium containing 250 U/ml of CLS-2 bacterial collagenase twice for 40 min at 37 C in a shaking water bath. The chips were then washed three times in DMEM, resuspended in  $\alpha$ -MEM with 10% NBCS, placed in 100-mm tissue culture dishes and incubated at 37 C. After this procedure, adherent cells could not be observed on any chip surfaces as determined by scanning electron microscopy. After approximately 1 week of incubation, cells were noted to migrate out of the chips. Confluent cultures were obtained after 3–4 weeks. To separate the cells from the chips, the cultures were treated with 0.02% trypsin for 5 min at 37 C. The released cells were then washed and plated at low density ( $1\text{--}2 \times 10^4/\text{ml}$ ;  $1000/\text{cm}^2$ ) in  $\alpha$ -MEM with 10% NBCS and grown to confluence (7–10 days). This population of cells was enriched for osteoblast markers including the expression of alkaline phosphatase as determined by FACS analysis, the constitutive secretion of the osteoblast-specific protein, osteocalcin, and the enhanced secretion of osteocalcin in response to  $1,25\text{-(OH)}_2\text{D}_3$  (Gundberg, C., and M. Horowitz, unpublished observations). For all experiments, monolayer cultures (murine and human) were used within 36 h of attaining confluence. Cells at confluence stop proliferating, display a low rate of DNA synthesis (39), but have not yet entered the phase of mineralization (40).

U-2OS cells are a moderately differentiated osteosarcoma of the tibia derived from a 15-yr-old girl in 1964 and obtained from American Type Culture Collection (ATCC HTB 96, Rockville, MD). Cells were maintained by weekly passage in RPMI 1640 medium supplemented with 10% NBCS. To prepare cells for stimulation, osteosarcoma cells were recovered from maintenance culture, washed, and seeded at  $10^4$  cells/ml into 100-mm tissue culture dishes in growth medium and were grown to 95% confluence (7 days) before stimulation.

### Cell stimulation and lysis

Cultures of murine or human osteoblastic cells and U-2OS cells were placed in  $\alpha$ -MEM with reduced serum (0.5%) for 16–18 h. The cells were then stimulated with OSM (100 ng/ml) for the time period indicated. At the end of the incubation period, the cells were at least 98% viable as assessed by trypan blue dye exclusion. Cells were immediately rinsed with two changes of ice-cold PBS. After decanting the PBS, the cell monolayers were scraped into an appropriate volume of either lysis buffer A or B. Buffer A contains 20 mM Tris, pH 7.2, 158 mM NaCl, 1.0% Triton X-100, 1.0% sodium deoxycholate, 0.1% SDS, and 5.0 mM EDTA. Buffer B is composed of 50 mM HEPES, pH 7.5, 150 mM NaCl, 1.0% Triton X-100, 10% glycerol, 1.0 mM EGTA, and 1.5 mM  $\text{MgCl}_2$ . Protease and phosphatase inhibitors were added to the PBS and lysis buffers and included 1.0 mM  $\text{Na}_3\text{VO}_4$ , 1.0  $\mu\text{g}/\text{ml}$  pepstatin, 10  $\mu\text{g}/\text{ml}$  leupeptin and aprotinin, 1.0 mM phenylmethylsulfonyl fluoride, and 50 mM sodium fluoride. Lysates were centrifuged at  $12,000 \times g$  for 15 min at 4 C and the supernatants collected. Protein concentration was determined in a Micro BCA protein assay kit using BSA as the standard. Each sample used for immunoprecipitations or Western blotting was adjusted so as to contain equivalent amounts of protein.

### Immunoprecipitation and Western blotting

For immunoprecipitation analysis, cell lysates (200–500  $\mu\text{g}$ ) were first precleared with Protein A-Sepharose for 1 h at 4 C. After removal of the Protein A-Sepharose, cell supernatants were incubated with the specified antibodies for 2–16 h at 4 C. The antigen-antibody complexes were recovered during a 30- to 60-min incubation using rabbit antimouse immunoglobulin and protein A-Sepharose or protein A-Sepharose alone. The immune complexes were washed 3–5 times with lysis buffer and the immunoprecipitated proteins eluted into SDS-PAGE sample buffer (3% SDS, 60 mM Tris, pH 6.9, 2 mM EDTA, 4% glycerol) by heating the samples to 100 C for 5 min.

Immunoprecipitated material or aliquots of total cell lysates (25–30  $\mu\text{g}$ ) were analyzed by 8% SDS-PAGE under reducing conditions fol-

lowed by electrophoretic transfer of the proteins to nitrocellulose. Western blotting procedures were performed essentially according to the procedures in the ECL system specified by Amersham. To reprobe the blots, nitrocellulose filters were stripped of antibodies in a solution containing 62.5 mM Tris, pH 6.7, 2% SDS, and 100 mM 2-mercaptoethanol at 50°C for 30 min.

## Results

### *OSM induces tyrosine phosphorylation of specific cellular proteins in cultured murine and human osteoblastic cells and a human osteosarcoma cell line*

In nonskeletal cells, signal transduction by OSM and its related family members has been shown to involve the activation of tyrosine kinases and subsequent phosphorylation of specific cellular proteins (reviewed in Ref. 41). To determine whether OSM induced protein tyrosine phosphorylation in osteoblastic cells, lysates prepared from serum-starved cultures that had been treated with 100 ng/ml OSM over a specified time course were resolved by 8% SDS-PAGE, transferred to nitrocellulose, and blotted with antiphosphotyrosine antibodies. As shown in Fig. 1A, OSM treatment of primary murine osteoblast-like cells induced tyrosine phosphorylation of proteins with mol wt of 150, 125–130, 89, 72, and 45K. The majority of the proteins appeared to be rapidly tyrosine phosphorylated within 1 min after OSM stimulation. Phosphorylation of the proteins reached maximal levels within 5 min after stimulation and was significantly diminished by 30 min.

Protein tyrosine phosphorylation was also induced when cultures of human osteoblastic cells were treated with OSM (Fig. 1B). The majority of proteins that became tyrosine phosphorylated in response to OSM treatment of primary human osteoblast-like cells had similar electrophoretic mobilities to

all of the induced tyrosine phosphorylated proteins detected in OSM-stimulated murine osteoblastic cells (designated by the *arrows* in Fig. 1, A and B). However, in human osteoblast-like cells, two additional proteins of mol wt 160K and 50–60K (designated by the single *asterisks* in Fig. 1B) became tyrosine phosphorylated in response to OSM. Tyrosine phosphorylation of all of the proteins was induced within 1–3 min, reached maximal levels at 5 min, and decreased by 30 min after OSM treatment, similar to the time course observed in OSM-stimulated murine osteoblastic cultures.

Osteosarcomas are the most common and malignant forms of bone tumors. They are the transformed counterparts of cells in the osteoblast lineage and are thought to arise from mesenchymal stem cells. Therefore, it was important to determine whether these cells responded to OSM in a fashion similar to that of normal cells. Cell lysates prepared from a human osteosarcoma cell line (U-2OS) cultured in the absence or presence of OSM for various time periods were immunoblotted with antiphosphotyrosine antibodies. Even though the basal level of tyrosine phosphorylation was higher in the U-2OS cells, the pattern of tyrosine phosphorylated proteins induced in the U-2OS cells after treatment with OSM, as shown in Fig. 1C, was similar to that observed in human osteoblastic cultures with the exception of a protein of mol wt 110K, which appeared to be only induced in the U-2OS cells (indicated by the *double asterisk* in Fig. 1C).

### *OSM stimulates the tyrosine phosphorylation of several JAK family members*

The JAK kinases have been shown to be tyrosine phosphorylated and activated in response to cytokine and growth factor stimulation in nonskeletal cells (4–6). Therefore, we determined whether JAK family members became tyrosine phosphorylated upon treatment of osteoblastic cultures with OSM. Lysates from OSM-treated murine osteoblast-like cells were immunoprecipitated using antiserum to JAK1, JAK2, and Tyk2 and analyzed by blotting with antiphosphotyrosine antibodies ( $\alpha$ P-Tyr). Data in Fig. 2 (upper) demonstrate that tyrosine phosphorylation of all three JAK family members was evident at times as early as 30 sec. Phosphorylation was transient, being diminished by 30 min after addition of OSM. When the blots were stripped of antiphosphotyrosine antibody and reprobbed with antiserum to the three respective kinases (lower), similar levels of protein were observed in all lanes of the time course tested. In addition, tyrosine phosphorylation of JAK1, JAK2, and Tyk2 was observed after a 5-min treatment of human osteoblastic cultures with OSM (Fig. 3) and in OSM-treated U-2OS cells (data not shown). Figure 3 also demonstrates that a major tyrosine phosphorylated protein of mol wt 120–130K induced by OSM-treatment of human osteoblastic cells and observed in the total cell lysate with antiphosphotyrosine antibodies (indicated by the *arrow*) has a similar electrophoretic mobility to phosphoproteins precipitated with  $\alpha$ JAK1 and  $\alpha$ JAK2 antibody preparations, therefore suggesting that this protein may represent a tyrosine phosphorylated JAK family member.

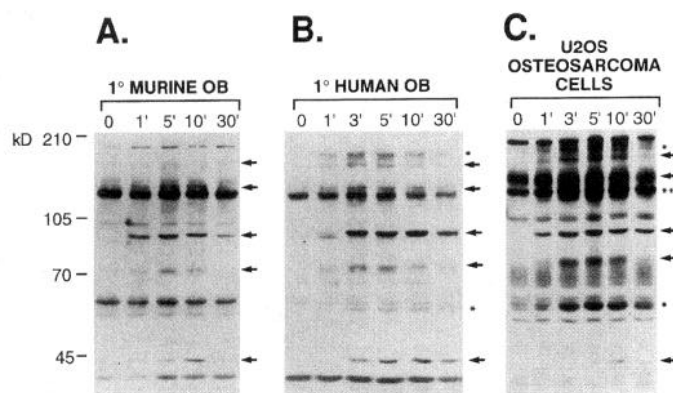

FIG. 1. OSM induces tyrosine phosphorylation in cultures of murine and human osteoblastic cells and a human osteosarcoma cell line. Cultures of murine osteoblastic cells (A), human osteoblastic cells (B), and the osteosarcoma cell line, U-2OS (C) were treated with vehicle alone (0') or OSM (100 ng/ml) for the various time periods indicated. Equal amounts of protein solubilized in lysis buffer A (25  $\mu$ g/time point) were separated on 8% SDS-PAGE, transferred to nitrocellulose and probed with antiphosphotyrosine antibodies. Bound antibody was detected in the ECL reaction. The *arrows* indicate proteins that become tyrosine phosphorylated in response to OSM in both murine and human osteoblastic cells and U-2OS cells. \*, Tyrosine phosphorylated proteins induced in OSM-treated human osteoblastic cells and U-2OS cells that are not observed in OSM-stimulated murine cultures. \*\*, Induced protein only observed in U-2OS cells.

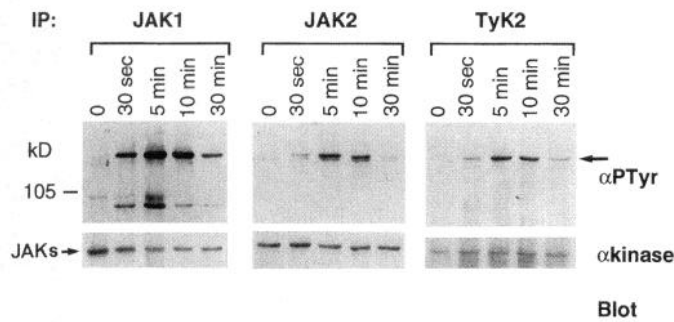

FIG. 2. Multiple JAK family members are transiently tyrosine phosphorylated in OSM-stimulated murine osteoblast-like cells. Murine osteoblastic cells were treated with OSM (100 ng/ml) for the various time periods indicated. At each time point, 500  $\mu$ g of cell protein prepared in Buffer B was immunoprecipitated with antiserum against JAK1, JAK2, or Tyk2. The immunoprecipitated material was separated on 8% SDS-PAGE, transferred to nitrocellulose, and immunoblotted with antiphosphotyrosine antibody (upper panels). The filters in the upper panel were stripped of antibody and reprobed in Western blots with antiserum against the appropriate JAK family member that was originally used in the immunoprecipitation. In the JAK1 immunoprecipitation, the proteins migrating at approximately 105 kDa may represent degradation products of JAK1. The arrow in the upper panel indicates the JAK proteins.

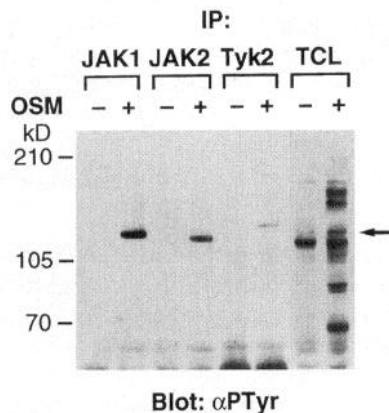

FIG. 3. JAK1, JAK2, and Tyk2 are tyrosine phosphorylated in response to OSM-treatment of human osteoblast-like cells. Protein solubilized in Buffer B (500  $\mu$ g) prepared from unstimulated or OSM-stimulated (5 min) cultures of human osteoblastic cells were immunoprecipitated with antibodies against JAK1, JAK2, or Tyk2. The immunoprecipitated material was analyzed by antiphosphotyrosine Western blotting. Total cell lysate (TCL; 25  $\mu$ g) from unstimulated and OSM-stimulated cells was analyzed on the same gel. The arrow indicates a tyrosine phosphorylated protein of mol wt 120–130K induced in stimulated cells and observed in total cell lysates.

#### Two distinct STAT proteins are tyrosine phosphorylated in OSM-treated osteoblastic cultures

Signaling initiated by cytokines, interferons, and growth factors induces tyrosine phosphorylation and activation of a new family of transcription factors, the STATs (7–14). One member of this family, Stat1 $\alpha$ , has been shown to be tyrosine phosphorylated and activated in response to different members of the LIF/IL-6 family in nonskeletal cells (5, 12). Two antibodies that recognize distinct regions of Stat1 $\alpha$  were used in immunoprecipitation analysis to determine whether Stat1 $\alpha$  became tyrosine phosphorylated in response to OSM treatment of osteoblastic cells. Immunoprecipitated material

was analyzed by antiphosphotyrosine Western blotting. Data in Fig. 4 demonstrate that antibodies generated against a carboxy-terminal portion of Stat1 $\alpha$  recognized a protein that displayed a low level of tyrosine phosphorylation in response to OSM treatment of murine osteoblast-like cells (C-terminal Stat1 $\alpha$ ; compare lanes 3 and 4). Low levels of tyrosine phosphorylation of Stat1 $\alpha$  were also detected using another antibody generated against an amino-terminal fragment of Stat1 $\alpha$  (Fig. 4; N-terminal Stat1 $\alpha$ ; compare lanes 1 and 2). In addition, OSM induced a major tyrosine phosphorylated protein that was only immunoprecipitated with the N-terminal Stat1 $\alpha$  antibody and migrated slightly faster than Stat1 $\alpha$  at a mol wt corresponding to approximately 88–89K (Fig. 4, lane 2). p88/89 recognized by the N-terminal antibody had a similar electrophoretic mobility to one of the major tyrosine phosphorylated proteins induced by OSM as observed in a total cell lysate by antiphosphotyrosine immunoblotting (lanes 2 and 5; p88 indicated by the arrowhead). Because this antibody has been shown to cross-react with Stat3, which migrates slightly faster than Stat1 $\alpha$  (5, 42, 43), p88 is likely to represent Stat3 that has become tyrosine phosphorylated in response to OSM.

Stat3 shares 50% homology with Stat1 $\alpha$  (12). It is tyrosine phosphorylated in Hep-G2 cells after treatment with IL-6 and related cytokines, as well as in other cell lines stimulated with various growth factors and interferons (5, 12–14). To confirm that the p88/89 tyrosine phosphorylated protein was Stat3, we repeated the studies with a Stat3-specific antibody. A major tyrosine phosphorylated protein induced by OSM treatment of murine (Fig. 5A) and human osteoblastic cells (Fig. 5B) was recognized by this antibody (upper panels; lanes 2). Tyrosine phosphorylated Stat3 had a similar electrophoretic mobility to the protein of mol wt 88–89K that became tyrosine phosphorylated in response to OSM as observed in total cell lysates on antiphosphotyrosine blots (Fig.

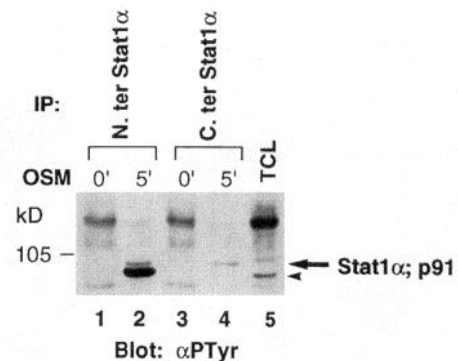

FIG. 4. The transcription factor, Stat1 $\alpha$ , and related family members are tyrosine phosphorylated in response to OSM-stimulation of murine osteoblastic cells. Cell lysates prepared in Buffer B from unstimulated (0') and OSM-stimulated (5') cultures of murine osteoblast-like cells were immunoprecipitated with two different antisera that recognize Stat1 $\alpha$ . One antibody was generated to an N-terminal peptide of Stat1 $\alpha$  (N. ter Stat1 $\alpha$ ; lanes 1 and 2) and the other to a C-terminal peptide (C. ter Stat1 $\alpha$ ; lanes 3 and 4). The immunoprecipitated material was analyzed by antiphosphotyrosine Western blotting. TCL from OSM-stimulated cells was also included on this gel (lane 5). The position of Stat1 $\alpha$  is indicated by the arrow. The position of a major tyrosine phosphorylated protein induced by OSM-treatment of osteoblasts and also immunoprecipitated by N-terminal Stat1 $\alpha$  antibodies in stimulated cells is indicated by the arrowhead.

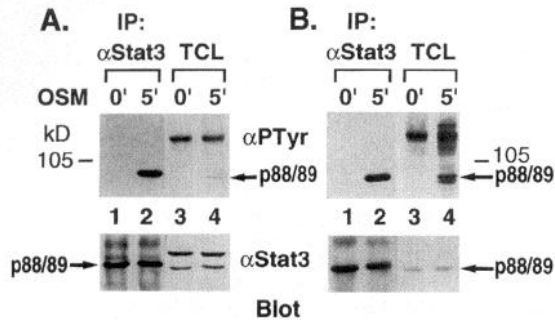

FIG. 5. The STAT family member, Stat3, is tyrosine phosphorylated in response to OSM-stimulation of cultures of murine and human osteoblastic cells. Solubilized protein prepared in Buffer B from unstimulated (0'; lane 1) and OSM-stimulated (5'; lane 2) murine osteoblast-like (A) and human osteoblast-like cells (B) were immunoprecipitated with anti-Stat3 antibodies and then analyzed by antiphosphotyrosine Western blotting ( $\alpha$ Ptyr; upper panel). The filters in the upper panels of A and B were stripped of antibody and reprobed with anti-Stat3 antibodies (lower panels of A and B). TCL from unstimulated (lane 3) and stimulated (lane 4) cultures of murine osteoblastic (A) and human osteoblastic cells (B) was included on this gel. The designation of Stat3 by p88/89 is indicated.

5, A and B, compare lanes 2 and 4). Equal protein loading of Stat3 was verified by reprobing the antiphosphotyrosine blots with antiserum to Stat3 (Fig. 5, A and B; lower panel). Therefore, two related transcription factors, Stat1 $\alpha$  and Stat3, are tyrosine phosphorylated in response to OSM treatment of human and mouse osteoblast-like cells.

### Discussion

The LIF/IL-6 subfamily of cytokines, which includes OSM, has been shown to induce a signaling cascade that involves the rapid tyrosine phosphorylation of specific cellular proteins ultimately leading to a wide variety of biological changes in nonskeletal cells. However, little is known about how OSM regulates bone cell function. In this report, we show for the first time that OSM induces the tyrosine phosphorylation of specific cellular proteins in biologically responsive murine and human osteoblastic cultures and in a human osteosarcoma cell line. Similar, but not identical, patterns of tyrosine phosphorylated proteins were induced by OSM treatment of Kaposi sarcoma cell lines and in human endothelial cells (44, 45). We demonstrate that a subset of the proteins that are tyrosine phosphorylated in response to OSM-treatment of osteoblasts includes members of the JAK-STAT signaling pathway. More specifically, the protein of mol wt 125–130K that becomes tyrosine phosphorylated in response to OSM is one of the JAK family members whereas the major tyrosine phosphorylated protein at 88–89K is presumably Stat3. In addition, other tyrosine phosphorylated proteins induced by OSM that were observed on antiphosphotyrosine blots of total cell lysates include the protein of mol wt 150K identified to be gp130, of 50–60K identified as one of the isoforms of the adaptor protein Shc, and of 44K as MAP kinase (46). Identification of the remaining tyrosine phosphorylated proteins awaits further investigation.

The receptors for the OSM cytokine family have been shown to use different members of the JAK-Tyk family and

are able to induce distinct patterns of JAK-Tyk tyrosine phosphorylation depending on the cell line examined (5, 6). Stimulation of EW-1 cells with OSM resulted in tyrosine phosphorylation of JAK1 and JAK2 but not Tyk2 (6). In HepG2 cells, OSM stimulated the tyrosine phosphorylation of JAK1 (5), whereas in our studies, OSM treatment of murine and human osteoblastic cells and a human osteosarcoma cell line induce transient tyrosine phosphorylation of all three JAK family members tested, JAK1, JAK2, and Tyk2. This result is not totally surprising in light of the finding in other cell types that stimulation by OSM or related family members leads to tyrosine phosphorylation of multiple JAK proteins (5, 6). Furthermore, in osteoblast-like cells, OSM induced tyrosine phosphorylation of at least two related transcription factors, Stat1 $\alpha$  and Stat3. Although similar results have been observed in the hepatocyte cell line HepG2, this is the first demonstration of tyrosine phosphorylation of the STAT family members in cultures of osteoblast-like cells in response to OSM (5). In both OSM-treated HepG2 cells and osteoblastic cells, tyrosine phosphorylated Stat3 was much more apparent than the tyrosine phosphorylated Stat1 $\alpha$  protein. This could be due to differences in the actual amount of Stat3 and Stat1 $\alpha$  present in the cells examined or may actually represent differences in the extent of tyrosine phosphorylation of different STAT family members in response to OSM.

The combination of JAK and STAT proteins that become phosphorylated is probably dependent on the cell line analyzed and the type of stimulation used. However, one possible explanation for our results in osteoblast-like cells is that the primary cultures contain a heterogeneous population of cells, each of which responds differently to OSM, leading to the tyrosine phosphorylation of multiple JAK and STAT family members. Extensive characterization of the murine osteoblastic cells reveals that the cells examined display markers of the osteoblast phenotype and the cultures are not contaminated with osteoclasts, macrophages, fibroblasts, or endothelial cells (36). Therefore, the great majority of these cells (greater than 95%) appear to represent osteoblastic cells or osteoblast-precursors, suggesting that cell heterogeneity cannot account for tyrosine phosphorylation of multiple JAK and STAT family members. We do recognize that heterogeneity can still exist in the primary cell cultures with respect to various stages of differentiated osteoblast-like cells present in the population. However, the analysis of OSM treatment of the clonal osteosarcoma cell line, derived from the osteoblast lineage, which demonstrated induction of tyrosine phosphorylation of all three JAK family members (data not shown) strongly suggests that OSM induces the tyrosine phosphorylation of multiple JAK family members in cells of the osteoblast lineage. Tyrosine phosphorylation of p88/89 in the OSM-treated osteosarcoma cell line as observed on antiphosphotyrosine immunoblotting further suggests that Stat3 is tyrosine phosphorylated in the clonal cell line as well as in the primary cultures. We therefore feel that our interpretation that multiple JAK members and at least Stat3 are tyrosine phosphorylated in response to OSM treatment of cells of the osteoblast lineage is reasonable based on similar findings in the clonal osteosarcoma cell line.

Treatment of cultures of murine osteoblastic cells with LIF, another IL-6 family member, leads to an enhanced secretion of IL-6 with a profile of induced tyrosine phosphorylated proteins similar to that observed with OSM-stimulated cells (28). Induction of an identical pattern of tyrosine phosphorylated proteins may be attributed to the utilization of the same receptor components by LIF and OSM, which has been reported in other cell types (reviewed in Ref. 41). In contrast, LIF was not very effective in inducing IL-6 secretion when added to cultures of human osteoblastic cells and failed to induce tyrosine phosphorylated proteins in these cells. This difference in responsiveness to LIF may be due to changes in the expression of the shared receptor components between murine and human osteoblast-like cells. Osteoblastic cells generally responded to other members of the LIF/IL-6 family with respect to tyrosine phosphorylation and IL-6 secretion to a much lesser degree than the response observed with OSM (28). Ciliary neurotrophic factor was weak at inducing tyrosine phosphorylation when added to cultures of murine osteoblastic cells and was also a poor inducer of IL-6 secretion. On the other hand, IL-6 only in combination with its soluble receptor component (sIL-6R), could induce tyrosine phosphorylation in human osteoblastic cells, which is consistent with the finding that IL-6 requires the sIL-6R to stimulate osteoclastogenesis in the murine coculture system (23). Finally, IL-11 was able to induce both tyrosine phosphorylation in murine osteoblast-like cells and IL-6 secretion (28). In contrast to our results with OSM on the phosphorylation of the different JAK family members, it has been reported that IL-11 induced phosphorylation of JAK2, with no effect on JAK1 in osteoblasts (47). Based on this latter comparison, the various members of the LIF/IL6 family when added to osteoblastic cells may phosphorylate different combinations of JAK proteins leading to differences in the profiles of tyrosine phosphorylated proteins observed.

Identification of the genes that become transcriptionally activated in osteoblastic cultures in response to OSM is critical in understanding the final biological consequences observed in the treated cells. In light of our findings, implicating the involvement of the JAK-STAT pathway in OSM-treated osteoblast-like cells, we anticipate that the promoters of several genes activated in osteoblastic cells will possess transcriptional elements recognized by various STAT family members. However, we cannot exclude the possibility that OSM induces other signaling pathways that would lead to the activation of transcription factors distinct from the STAT family. For example, in Kaposi cells OSM induces the tyrosine phosphorylation and activation of MAP kinase, which presumably would lead to the activation of different classes of transcription factors (44). Similarly, we recently identified the protein of mol wt 44K that is tyrosine phosphorylated in murine and human osteoblastic cultures in response to OSM as MAP kinase (46). Ultimately the links between the signaling pathways and the genes that become activated will provide a clearer understanding of the biological effects of OSM and the other members of the LIF/IL-6 subfamily of cytokines in osteoblast function.

## Acknowledgments

The authors wish to thank Ms. Andrea Fields and Ms. Emily DiDomenico for expert technical assistance and Dr. Michael Centrella for reviewing this manuscript.

## References

- Hirano T, Akira S, Taga T, Kishimoto T 1990 Biological and clinical aspects of interleukin 6. *Immunol Today* 11:443-449
- Lorenzo JA 1991 The role of cytokines in the regulation of local bone resorption. *Crit Rev Immunol* 11:195-213
- Patterson PH 1992 The emerging neuropoietic cytokine family; first CDF/LIF, CNTF and IL-6; next ONC, MGF, GCSF? *Curr Opin Neurobiol* 2:94-99
- Ziemięcki A, Harpur AG, Wilks AF 1994 JAK protein tyrosine kinases: their role in cytokine signaling. *Trends Cell Biol* 4:207-211
- Lutticken C, Wegenka UM, Yuan J, Buschmann J, Schindler C, Ziemięcki A, Harpur AG, Wilks AF, Yasukawa K, Taga T, Kishimoto T, Barbieri G, Pellegrini S, Sendtner M, Heinrich PC, Horn F 1994 Association of transcription factor APRF and protein kinase Jak1 with the interleukin-6 signal transducer gp130. *Science* 263:89-92
- Stahl N, Boulton TG, Farruggella T, Ip NY, Davis S, Witthuhn BA, Quelle FW, Silvennoinen O, Barbieri G, Pellegrini S, Ihle JH, Yancopoulos GD 1994 Association and activation of Jak-Tyk kinases by CNTF-LIF-OSM-IL-6  $\beta$  receptor components. *Science* 263:92-95
- Darnell Jr JE, Kerr IM, Stark GR 1994 Jak-STAT pathways and transcriptional activation in response to IFNs and other extracellular signaling proteins. *Science* 264:1415-1421
- Lerner AC, David M, Feldman GM, Igarashi K, Hackett RH, Webb DSA, Sweitzer SM, Petricoin III EF, Finbloom DS 1993 Tyrosine phosphorylation of DNA binding proteins by multiple cytokines. *Science* 261:1730-1733
- Silvennoinen O, Schindler C, Schlessinger J, Levy DE 1993 Ras-independent growth factor signaling by transcription factor tyrosine phosphorylation. *Science* 261:1736-1739
- Sadowski HB, Shuai K, Darnell Jr JE, Gilman MZ 1993 A common nuclear signal transduction pathway activated by growth factor and cytokine receptors. *Science* 261:1739-1744
- Silvennoinen O, Ihle JN, Schlessinger J, Levy DE 1993 Interferon-induced nuclear signalling by Jak protein tyrosine kinases. *Nature* 366:583-585
- Akira S, Nishio Y, Inoue M, Wang X-J, Wei S, Matsusaka T, Yoshida K, Sudo T, Naruto M, Kishimoto T 1994 Molecular cloning of APRF, a novel IFN-stimulated gene factor 3 p91-related transcription factor involved in the gp130-mediated signaling pathway. *Cell* 77:63-71
- Zhong Z, Wen Z, Darnell Jr JE 1994 Stat3: a STAT family member activated by tyrosine phosphorylation in response to epidermal growth factor and interleukin-6. *Science* 264:95-98
- Raz R, Durbin JE, Levy DE 1994 Acute phase response factor and additional members of the ISGF3 family integrate diverse signals from cytokines, interferons, and growth factors. *J Biol Chem* 269:24391-24395
- Elford PR, Felix R, Cecchini M, Trechsel U, Fleisch H 1987 Murine osteoblast-like cells and osteogenic cell MC3T3-E1 release a macrophage colony stimulating activity in culture. *Calcif Tissue Int* 41:151-156
- Horowitz MC, Coleman DL, Flood PM, Kupper TS, Jilka RL 1989 Parathyroid hormone and lipopolysaccharide induce murine osteoblast-like cells to secrete a cytokine indistinguishable from granulocyte-macrophage colony stimulating factor. *J Clin Invest* 83:149-157
- Rose TM, Bruce AG 1991 Oncostatin M is a member of a cytokine family that includes leukemia-inhibitory factor, granulocyte colony-stimulating factor and interleukin 6. *Proc Natl Acad Sci USA* 88:8641-8645
- Gearing DP, Comeau MR, Friend DJ, Gimpel SD, Thut CJ, McGourty J, Brasher KK, King JA, Gillis S, Mosley B, Ziegler SF, Cosman D 1992 The IL-6 signal transducer, gp130: an oncostatin M receptor and affinity converter for the LIF receptor. *Science* 255:1434-1437

19. Ip NY, Nye SH, Boulton TG, Davis S, Taga T, Li Y, Birren SJ, Yasukawa K, Kishimoto T, Anderson DJ, Stahl N, Yancopoulos GD 1992 CNTF and LIF act on neuronal cells via shared signaling pathways that involve the IL-6 signal transducing receptor component gp130. *Cell* 69:1121–1132
20. Kishimoto T, Akira S, Taga T 1992 Interleukin-6 and its receptor: a paradigm for cytokines. *Science* 258:593–597
21. Yin T, Taga T, Tsang ML-S, Yasukawa T, Kishimoto T, Yang Y-C 1993 Involvement of interleukin-6 signal transducer gp130 in interleukin-11-mediated signal transduction. *J Immunol* 151:2555–2561
22. Pennica D, Shaw KJ, Swanson TA, Moore MW, Shelton DL, Zioncheck KA, Rosenthal A, Taga T, Paoni NF, Wood WI 1995 Cardiotropin-1. Biological activities and binding to the leukemia inhibitory factor receptor/gp130 signaling complex. *J Biol Chem* 270:10915–10922
23. Tamura T, Udagawa N, Takahashi N, Miyaura C, Tanaka S, Yamada Y, Koishihara Y, Ohsugi Y, Kumaki K, Taga T, Kishimoto T, Suda T 1993 Soluble interleukin-6 receptor triggers osteoclast formation by interleukin-6. *Proc Natl Acad Sci USA* 90:11924–11928
24. Jilka RL, Hangoc G, Girasole G, Passeri G, Williams DC, Abrams JS, Boyce B, Broxmeyer H, Manolagas SC 1992 Increased osteoclast development after estrogen loss: mediation by interleukin-6. *Science* 257:88–91
25. Girasole G, Passeri G, Jilka RL, Manolagas SC 1994 Interleukin-11: a new cytokine critical for osteoclast development. *J Clin Invest* 93:1516–1524
26. Marusic A, Kalinowski JF, Jastrzebski S, Lorenzo JA 1993 Production of leukemia inhibitory factor mRNA and protein by malignant and immortalized bone cells. *J Bone Miner Res* 8:617–624
27. Elias JA, Tang W, Horowitz MC 1995 Cytokine and hormonal stimulation of human osteosarcoma interleukin-11 production. *Endocrinology* 136:489–498
28. Horowitz MC, Stahl N, Fields A, Baron R, Levy JB 1994 Differential signal transduction induced by LIF/IL-6 cytokines in osteoblasts. *J Bone Miner Res* 9:S170 (Abstract)
29. Reid IR, Lowe C, Cornish J, Skinner SJM, Hilton DJ, Wilson TA, Gearing DP, Martin TJ 1990 Leukemia inhibitory factor: a novel bone-active cytokine. *Endocrinology* 126:1416–1420
30. Allan EH, Hilton DJ, Brown MA, Evelyn RS, Yumita S, Metcalf D, Gough NM, Ng KW, Nicola NA, Martin TJ 1990 Osteoblasts display receptors for and responses to leukemia-inhibitory factor. *J Cell Physiol* 145:110–119
31. Noda M, Vogel RL, Hasson DM, Rodan GA 1990 Leukemia inhibitory factor suppresses proliferation, alkaline phosphatase activity, and type I collagen messenger ribonucleic acid level and enhances osteopontin mRNA level in murine osteoblast-like (MC3T3E1) cells. *Endocrinology* 127:185–190
32. Greenfield EM, Shaw SM, Gornik SA, Banks MA 1995 Adenyl cyclase and interleukin 6 are downstream effectors of parathyroid hormone resulting in stimulation of bone resorption. *J Clin Invest* 96:1238–1244
33. Malik N, Haugen HS, Modrell B, Shoyab M, Clegg CH 1995 Developmental abnormalities in mice transgenic for bovine oncostatin M. *Mol Cell Biol* 15:2349–2358
34. Jay PR, Centrella M, Lorenzo J, Bruce AG, Horowitz MC 1996 Oncostatin M: a new bone active cytokine which activates osteoblasts and inhibits bone resorption. *Endocrinology* 137:1151–1158
35. Schindler C, Fu X-Y, Improta T, Aebersold R, Darnell Jr JE 1992 Proteins of transcription factor ISGF-3: one gene encodes the 91- and 84-kDa ISGF-3 proteins that are activated by interferon  $\alpha$ . *Proc Natl Acad Sci USA* 89:7836–7839
36. Horowitz MC, Fields A, DeMeo D, Qian H-Y, Bothwell ALM, Trepmann E 1994 Expression and regulation of Ly-6 differentiation antigens by murine osteoblasts. *Endocrinology* 135:1032–1043
37. Centrella M, McCarthy TL, Canalis E 1987 Transforming growth factor beta is a bifunctional regulator of regulation and collagen synthesis in osteoblast-enriched cell cultures from fetal rat calvariae. *J Biol Chem* 262:2869–2874
38. Simmons D, Kent GN, Jilka RL, Scott DM, Mallon M, Cohn DV 1982 Formation of bone by isolated cultured osteoblasts in millipore diffusion chambers. *Calcif Tissue Int* 34:291–294
39. Centrella M, McCarthy TL, Canalis E 1989 Platelet-derived growth factor enhances deoxyribonucleic acid and collagen synthesis in osteoblast-enriched cultures from fetal rat parietal bone. *Endocrinology* 125:13–19
40. Stein GS, Lian JB 1993 Molecular mechanisms mediating proliferation/differentiation interrelationships during progressive development of the osteoblast phenotype. *Endocr Rev* 14:424–442
41. Stahl N, Yancopoulos GD 1993 The alphas, betas, and kinases of cytokine receptor complexes. *Cell* 74:587–590
42. Bonni A, Frank DA, Schindler C, Greenberg ME 1993 Characterization of a pathway for ciliary neurotrophic factor signaling to the nucleus. *Science* 262:1575–1579
43. Wegenka U, Luttkicken C, Buschmann J, Yuan J, Lottspeich F, Muller-Esterl W, Schindler C, Roeb E, Heinrich PC, Horn F 1994 The interleukin-6-activated acute-phase response factor is antigenically and functionally related to members of the signal transducer and activator of transcription (STAT) family. *Mol Cell Biol* 14:3186–3196
44. Amaral MC, Miles S, Kumar G, Nel AE 1993 Oncostatin-M stimulates tyrosine protein phosphorylation in parallel with the activation of p42 MAPK/ERK-2 in Kaposi's cells. Evidence that this pathway is important in Kaposi cell growth. *J Clin Invest* 92:848–857
45. Schieven GL, Kallestad JC, Brown TJ, Ledbetter JA, Linsley PS 1992 Oncostatin M induces tyrosine phosphorylation in endothelial cells and activation of p62<sup>src</sup> tyrosine kinase. *J Immunol* 149:1676–1682
46. Horowitz MC, Levy JB 1995 Differential usage of adaptor proteins in the activation of the ras pathway by oncostatin M in osteoblasts. *J Bone Miner Res* 10:S309 (Abstract)
47. Lowe C, Gillespie GAJ, Pike JW 1994 Activation of the JAK/STAT signal transduction pathway in murine osteoblasts. *J Bone Miner Res* 9:S234 (Abstract)
